# Supplementary material for: Pd0-mediated rapid coupling of methyl iodide with excess amounts of benzyl- and cinnamylboronic acid esters: efficient method for incorporation of positron-emitting 11C radionuclide into organic frameworks by coupling between two sp3-hybridized carbons
Source: Royal Society of Chemistry journal article supplement (doi:10.1039/c3ra40815a), 2013-01-01
Supplement: c3ra40815a.pdf [file c3ra40815a.pdf]

**Supporting Information for**

**Pd<sup>0</sup>-Mediated Rapid Coupling of Methyl Iodide with Excess Amounts of Benzyl- and Cinnamylboronic Acid Esters: Efficient Method for Incorporation of Positron-Emitting <sup>11</sup>C Radionuclide into Organic Frameworks by Coupling between Two sp<sup>3</sup>-Hybridized Carbons**

**Hiroko Koyama,<sup>a</sup> Zhouen Zhang,<sup>b</sup> Ryosuke Ijuin,<sup>b</sup> Siqin,<sup>a</sup> Jeongwan Son,<sup>a</sup> Yuma Hatta,<sup>a</sup> Masashi Ohta,<sup>a</sup> Masahiro Wakao,<sup>a</sup> Takamitsu Hosoya,<sup>a</sup> Hisashi Doi<sup>b</sup> and Masaaki Suzuki<sup>\*b</sup>**

<sup>a</sup> *Division of Regeneration and Advanced Medical Science, Gifu University Graduated School of Medicine, Gifu University, 1-1 Yanagido, Gifu 501-1194, Japan*

<sup>b</sup> *Center for Molecular Imaging Science, RIKEN Kobe Institute, 6-7-3 Minatojima-minamimachi, Chuo-ku, Kobe, Hyogo 650-0047, Japan; Fax: (+81)78-304-7131; E-mail: suzuki.masaaki@riken.jp*

1. Synthesis of 4,4,5,5-tetramethyl-2-(3-phenylpropyl)-1,3,2-dioxaborolane (**9**) and the rapid C-methylation of **9**
2. The rapid C-methylation of *B*-benzyl-9-BBN (**12**) and *B*-(3-phenylpropyl)-9-BBN (**13**)
3. Synthesis of benzylboronic acid pinacol ester derivatives **7** and the corresponding ethylbenzenes **8**
4. a) HPLC (RI) chart after the rapid C-[<sup>11</sup>C]methylation of [<sup>11</sup>C]methyl iodide and **7c**, giving [<sup>11</sup>C]**8c** (retention time; 7.8 min), b) HPLC (UV 254 nm) chart after the rapid

C-[<sup>11</sup>C]methylation of [<sup>11</sup>C]methyl iodide and **7c**, c) HPLC (RI) chart after purification of [<sup>11</sup>C]**8c**, giving [<sup>11</sup>C]**8c** (retention time; 3.8 min), and d) HPLC (UV 254 nm) chart after purification of [<sup>11</sup>C]**8c**:

- a) HPLC (RI) chart of [<sup>11</sup>C]**8c**, b) HPLC (UV 254 nm) chart of [<sup>11</sup>C]**8c**, c) HPLC (RI) chart for co-injection of [<sup>11</sup>C]**8c** and **8c**, d) HPLC (UV 254 nm) chart for co-injection of [<sup>11</sup>C]**8c** and **8c**
- References

### 1. Synthesis of 4,4,5,5-tetramethyl-2-(3-phenylpropyl)-1,3,2-dioxaborolane (**9**) and the rapid C-methylation of **8l**: (*E*)-2-(3-phenyl-2-propenyl)-4,4,5,5-tetramethyl-1,3,2-dioxaborolane (**7l**):

CAS Registry Number: 147609-46-9

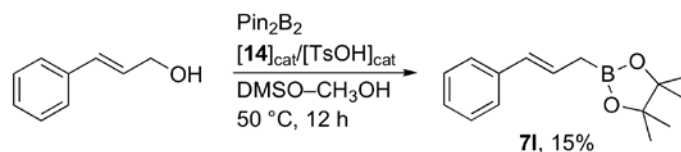

**14**: di- $\mu$ -chlorobis{2-[(dimethylamino)methyl]phenyl-C,N}dipalladium (II)

<sup>1</sup>H NMR (400 MHz,  $\text{CDCl}_3$ ):  $\delta = 7.13\text{--}7.33$  (m, 5H),  $6.23\text{--}6.38$  (m, 2H),  $1.86$  (d,  $^3J(\text{H,H}) = 6.8$  Hz, 2H),  $1.25$  (s, 12H) ppm; <sup>13</sup>C NMR (100 MHz,  $\text{CDCl}_3$ ,  $25\text{ }^\circ\text{C}$ ):  $\delta = 138.3, 130.3, 128.4$  (2C),  $126.5, 126.4, 125.9$  (2C),  $83.4$  (2C),  $26.2, 24.9$  (4C) ppm.

**4,4,5,5-tetramethyl-2-(3-phenylpropyl)-1,3,2-dioxaborolane (9)**: CAS Registry Number: 329685-40-7

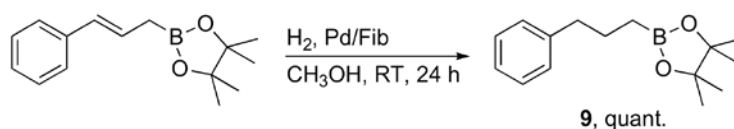

$^1\text{H}$  NMR (400 MHz,  $\text{CDCl}_3$ ):  $\delta$  = 7.13–7.27 (m, 5H), 2.60 (t,  $^3J(\text{H,H})$  = 8.0 Hz, 2H), 1.73 (qintet,  $^3J(\text{H,H})$  = 8.0 Hz, 2H), 0.81 (t,  $^3J(\text{H,H})$  = 8.0 Hz, 2H) ppm;  $^{13}\text{C}$  NMR (100 MHz,  $\text{CDCl}_3$ , 25 °C):  $\delta$  = 142.8, 128.6, 128.2, 125.6, 83.0 (2C), 38.7, 26.2, 24.9 (4C) ppm.

**Synthesis of butylbenzene (10) by rapid C-methylation using methyl iodide and an excess amount of 3-phenylpropylboronic acid pinacol ester (9)**

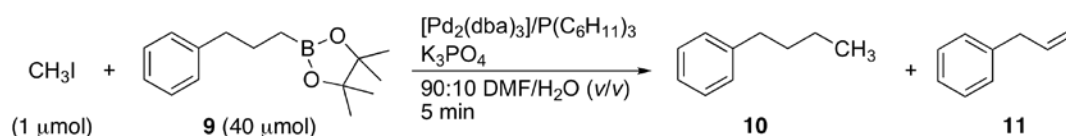

$[\text{Pd}_2(\text{dba})_3]$  (0.5 mg, 0.5  $\mu\text{mol}$ ),  $\text{P}(\text{C}_6\text{H}_{11})_3$  (0.6 mg, 2  $\mu\text{mol}$ ), and  $\text{K}_3\text{PO}_4$  (2.1 mg, 10  $\mu\text{mol}$ ) were placed under Ar in a 2-mL Schlenk tube. Then, the solution of boronic acid ester **9** (9.8 mg, 40  $\mu\text{mol}$ ) in co-solvent 90:10 DMF/ $\text{H}_2\text{O}$  (v/v) (200  $\mu\text{L}$ ) was added, and then, a solution of  $\text{CH}_3\text{I}$  (0.2 M DMF solution, 5  $\mu\text{L}$ , 1  $\mu\text{mol}$ ) was added. After stirring at 60 °C for 5 min, the resulting mixture was rapidly cooled in an ice bath, filtered through a short column of silica gel (0.5 g), and eluted with ethyl ether (ca. 2 mL), followed by the addition of *n*-nonane (0.1 M DMF solution, 10  $\mu\text{L}$ , 1  $\mu\text{mol}$ ) as an internal standard. The resulting solution was analyzed by GLC under the conditions: Shimadzu GC-2010 instrument equipped with a flame ionization detector; capillary column: GL Science TC-1701 (60 m  $\times$  0.25 mm i.d.); carrier gas: He (flow rate: 0.57 mL  $\text{min}^{-1}$ ); injector temperature: 280 °C; detector temperature: 280 °C; column temperature: initial 70 °C, final 230 °C; temperature gradient: +15 °C  $\text{min}^{-1}$ , from 5 to 9 min, and 20 °C  $\text{min}^{-1}$  from 15 to 20 min. The yield of **10** was 1% based on the starting  $\text{CH}_3\text{I}$  (retention time: 20.04 min). The yield of **11** was 3% based on the starting methyl iodide (retention time: 17.27 min), or 0.1% based on the boronic acid ester consumption. The product was identified by GC with an added authentic reference. The methylation reactions under other conditions shown in ref. 6 in the text were conducted by the same procedure.

**2. The rapid C-methylation of *B*-benzyl-9-BBN (**12**) and *B*-(3-phenylpropyl)-9-BBN (**13**):  
Synthesis of ethylbenzene (**2**) by rapid C-methylation using methyl iodide and an excess  
amount of *B*-benzyl-9-BBN (**12**) using ferrocenyl complex**

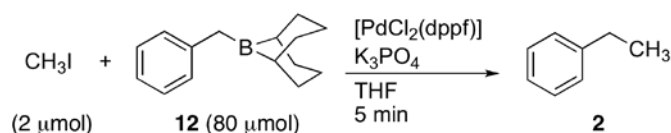

[1,1'-Bis(diphenylphosphino)ferrocene]dichloropalladium(II) ([PdCl<sub>2</sub>(dppf)], 1.6 mg, 2 μmol) and K<sub>3</sub>PO<sub>4</sub> (4.2 mg, 20 μmol) were placed under Ar in a 2-mL Schlenk tube. Then, the solution of *B*-benzyl-9-BBN (**12**) (0.5 M THF solution, 0.16 mL, 80 μmol) in THF was added, and then, a solution of CH<sub>3</sub>I (0.1 M DMF solution, 20 μL, 2 μmol) was added. After stirring at 80 °C oil bath temperature for 5 min, the resulting mixture was rapidly cooled in an ice bath, filtered through a short column of silica gel (0.5 g), and eluted with ethyl ether (ca. 2 mL), followed by the addition of *n*-nonane (0.1 M DMF solution, 10 μL, 1 μmol) as an internal standard. The resulting solution was analyzed by GC. The yield of **2** was 30% based on the starting CH<sub>3</sub>I.

**Synthesis of butylbenzene (**10**) by rapid C-methylation using methyl iodide and an excess  
amount of *B*-(3-phenylpropyl)-9-BBN (**13**)<sup>1</sup> using ferrocenyl complex**

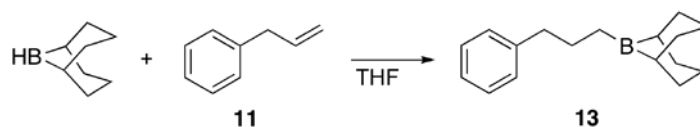

9-BBN (0.4 M in THF solution, 0.20 mL) was added to the solution of phenylpropene (**11**) (9.4 mg, 80 μmol) in THF (200 μL) at 0 °C in a 10-mL Schlenk tube. After addition, the mixture was stirred at RT for two hours.<sup>2</sup> The solvent was removed under reduced pressure. After the Schlenk

tube was filled with Ar, the residue was used as the substrate on the following reaction without further purification.

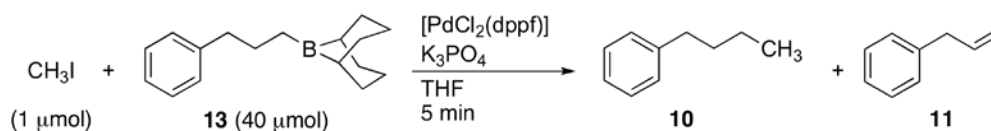

$[\text{PdCl}_2(\text{dppf})]$  (1.6 mg, 2  $\mu\text{mol}$ ) and  $\text{K}_3\text{PO}_4$  (4.2 mg, 20  $\mu\text{mol}$ ) were placed under Ar in a 2-mL Schlenk tube. Then, the solution of *B*-(3-phenylpropyl)-9-borobicyclo[3.3.1]nonane (**13**) in THF (200  $\mu\text{L}$ ) was added, and then, a solution of  $\text{CH}_3\text{I}$  (0.1 M DMF solution, 20  $\mu\text{L}$ , 2  $\mu\text{mol}$ ) was added. After stirring at 80 °C oil bath temperature for 5 min, the resulting mixture was rapidly cooled in an ice bath, filtered through a short column of silica gel (0.5 g), and eluted with ethyl ether (ca. 2 mL), followed by the addition of *n*-nonane (0.1 M DMF solution, 10  $\mu\text{L}$ , 1  $\mu\text{mol}$ ) as an internal standard. The resulting solution was analyzed by GC. The yield of **10** was 2% based on the starting  $\text{CH}_3\text{I}$ . The yield of **11** was 235% based on the starting  $\text{CH}_3\text{I}$ , or 6% based on the alkyl 9-BBN substrate consumption.

### 3. Synthesis of benzylboronic acid pinacol ester derivatives **9** and the corresponding ethylbenzenes **10**: 2-(4-methoxybenzyl)-4,4,5,5-tetramethyl-1,3,2-Dioxaborolane (**7a**): CAS

Registry Number: 475250-52-3

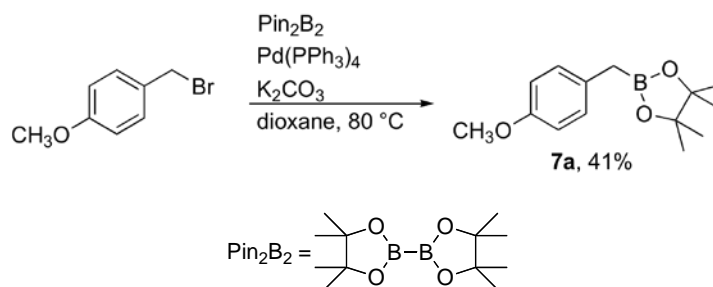

$^1\text{H}$  NMR (400 MHz,  $\text{CDCl}_3$ ):  $\delta$  = 7.09–7.06 (m, 2H), 6.79–6.76 (m, 2H), 3.75 (s, 3H), 2.21 (s, 2H), 1.24 (s, 12H) ppm;  $^{13}\text{C}$  NMR (126 MHz,  $\text{CDCl}_3$ , 25 °C):  $\delta$  = 154.6, 149.7, 130.2, 126.9, 110.5, 109.0, 83.5 (2C), 56.2, 56.1, 37.8, 24.8 (4C) ppm.

**2-(4-Methylbenzyl)-4,4,5,5-tetramethyl-1,3,2-dioxaborolane (7d):** CAS Registry Number:

356570-52-0

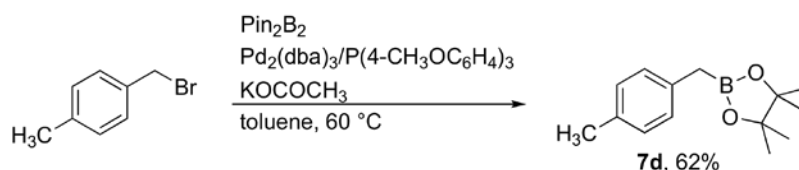

$^1\text{H}$  NMR (400 MHz,  $\text{CDCl}_3$ ):  $\delta$  = 7.03–7.08 (m, 4H), 2.29 (s, 3H), 2.25 (s, 2H), 1.23 (s, 12H) ppm;

$^{13}\text{C}$  NMR (100 MHz,  $\text{CDCl}_3$ , 25 °C):  $\delta$  = 135.5, 134.2, 129.1, 128.9, 83.4 (2C), 24.8 (4C), 21.0

ppm.

**2-Benzyl-5,5-dimethyl-1,3,2-dioxaborinane (7e):** CAS Registry Number: 162213-36-7

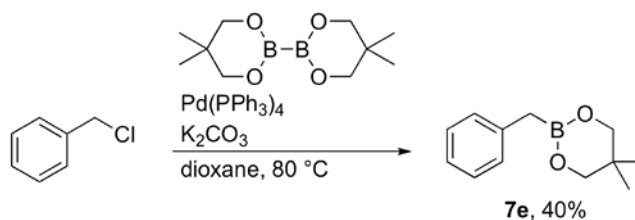

$^1\text{H}$  NMR (400 MHz,  $\text{CDCl}_3$ ):  $\delta$  = 7.08–7.25 (m, 5H), 3.58 (s, 4H), 0.92 ppm (s, 6H);  $^{13}\text{C}$  NMR

(100 MHz,  $\text{CDCl}_3$ , 25 °C):  $\delta$  = 140.0, 129.0 (2C), 128.2 (2C), 124.7, 72.3 (2C), 31.7, 24.0, 21.9

(2C) ppm.

**2-(4-Chlorobenzyl)-4,4,5,5-tetramethyl-1,3,2-dioxaborolane (7f):** CAS Registry Number:

475250-49-8

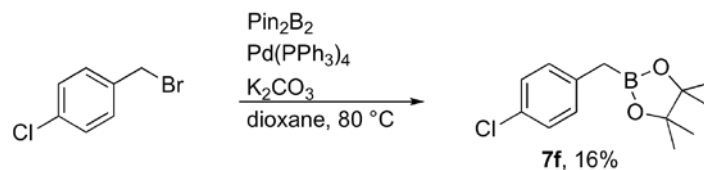

$^1\text{H}$  NMR (400 MHz,  $\text{CDCl}_3$ ):  $\delta = 7.09\text{--}7.20$  (AA'BB', 4H), 2.25 (s, 2H), 1.23 (s, 12H) ppm;  $^{13}\text{C}$  NMR (100 MHz,  $\text{CDCl}_3$ ,  $25\text{ }^\circ\text{C}$ ):  $\delta = 137.2$ , 130.6, 130.4 (2C), 128.4 (2C), 83.6 (2C), 24.8 (4C), 19.2 ppm.

**2-(4-Fluorobenzyl)-4,4,5,5-tetramethyl-1,3,2-dioxaborolane (7g)**: CAS Registry Number:

243145-83-7

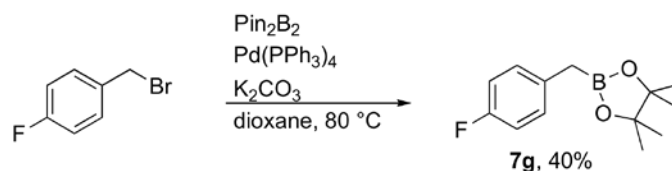

$^1\text{H}$  NMR (400 MHz,  $\text{CDCl}_3$ ):  $\delta = 6.70\text{--}7.31$  (m, 4H), 2.24 (s, 2H), 1.22 (s, 12H) ppm;  $^{13}\text{C}$  NMR (100 MHz,  $\text{CDCl}_3$ ,  $25\text{ }^\circ\text{C}$ ):  $\delta = 161.0$  (d,  $^1J(\text{C},\text{F}) = 240$  Hz), 134.2, 130.2 (d,  $J(\text{C},\text{F}) = 6.7$  Hz), 115.0 (d,  $J(\text{C},\text{F}) = 20.9$  Hz), 83.6 (2C), 24.8 (4C), 19.3 ppm.

**2-(2-Fluorobenzyl)-4,4,5,5-tetramethyl-1,3,2-dioxaborolane (7h)**: CAS Registry Number:

517920-60-4

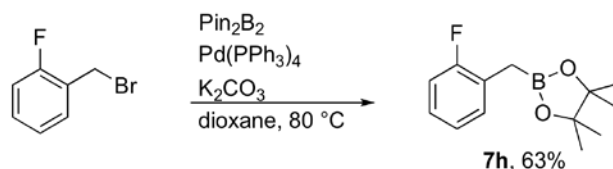

$^1\text{H}$  NMR (400 MHz,  $\text{CDCl}_3$ ):  $\delta = 6.96\text{--}7.20$  (m, 4H), 2.25 (s, 2H), 1.24 (s, 12H) ppm;  $^{13}\text{C}$  NMR (100 MHz,  $\text{CDCl}_3$ ,  $25\text{ }^\circ\text{C}$ ):  $\delta = 161.1$  (d,  $^1J(\text{C},\text{F}) = 242$  Hz), 131.4, 126.7 (d,  $J(\text{C},\text{F}) = 7.6$  Hz), 126.1 (d,  $J(\text{C},\text{F}) = 16.2$  Hz), 123.9, 115.0 (d,  $J(\text{C},\text{F}) = 22$  Hz), 83.6 (2C), 24.8 (4C), 13.2 ppm.

**2-[3-(Trifluoromethyl)benzyl]-4,4,5,5-tetramethyl-1,3,2-dioxaborolane (7j):** CAS Registry

Number: 1190235-39-2

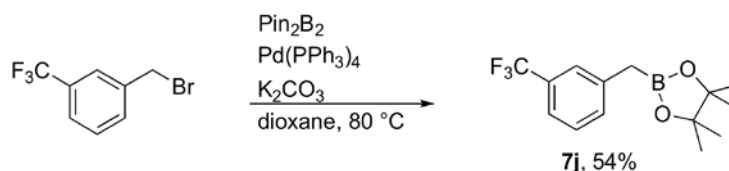

$^1\text{H}$  NMR (400 MHz,  $\text{CDCl}_3$ ):  $\delta = 7.25\text{--}7.43$  (m, 4H), 2.33 (s, 2H), 1.22 (s, 12H) ppm;  $^{13}\text{C}$  NMR (100 MHz,  $\text{CDCl}_3$ ,  $25^\circ\text{C}$ ):  $\delta = 139.7$ , 132.5, 130.5 (q,  $^1J(\text{C},\text{F}) = 31.5$  Hz), 128.6, 125.8, 123.1, 121.8, 83.8, (2C), 24.9 (4C), 20.3 ppm; HRMS ( $\text{EI}^+$ ):  $m/z$ : calcd for  $\text{C}_{14}\text{H}_{18}\text{BF}_3\text{O}_2$ : 286.1352; found 286.1371.

**2-[4-(Trifluoromethyl)benzyl]-4,4,5,5-tetramethyl-1,3,2-dioxaborolane (7k):** CAS Registry

Number: 475250-46-5

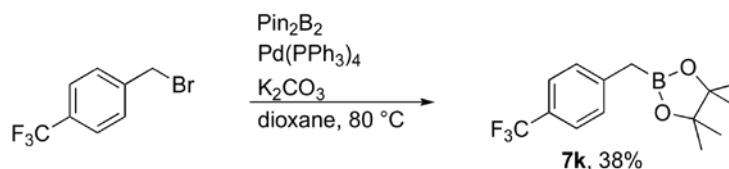

$^1\text{H}$  NMR (500 MHz,  $\text{CDCl}_3$ ):  $\delta = 7.27\text{--}7.49$  (AX, 4H), 2.35 (s, 2H), 1.23 (s, 12H) ppm;  $^{13}\text{C}$  NMR (100 MHz,  $\text{CDCl}_3$ ,  $25^\circ\text{C}$ ):  $\delta = 143.2$ , 129.2 (2C), 127.3 (q,  $^1J(\text{C},\text{F}) = 32.5$  Hz), 125.2, (2C), 123.3, 83.8, (2C), 24.8 (4C), 20.3 ppm.

**1,2-Dimethoxy-4-ethylbenzene (8b):** CAS Registry Number: 5888-51-7



$^1\text{H}$  NMR (400 MHz,  $\text{CDCl}_3$ ):  $\delta$  = 6.71–6.81 (m, 3H), 3.88 (s, 3H), 3.86 (s, 3H), 2.62 (q,  $^3J(\text{H,H})$  = 7.7 Hz, 2H), 1.23 (t,  $^3J(\text{H,H})$  = 7.7 Hz, 3H) ppm;  $^{13}\text{C}$  NMR (100 MHz,  $\text{CDCl}_3$ , 25 °C):  $\delta$  = 148.9, 147.1, 137.1, 119.5, 111.4, 111.3, 56.0, 55.9, 28.5, 15.9 ppm.

***N*-(4-Ethylphenyl)propionamide (8c)**: CAS Registry Number: 20172-37-6

$^1\text{H}$  NMR (400 MHz,  $\text{CDCl}_3$ ):  $\delta$  = 7.39 (d,  $^3J(\text{H,H})$  = 7.9 Hz, 2H), 7.11 (d,  $^3J(\text{H,H})$  = 7.6 Hz, 2H), 2.59 (q,  $^3J(\text{H,H})$  = 7.6 Hz, 2H), 2.36 (d,  $^3J(\text{H,H})$  = 7.6 Hz, 2H), 1.18–1.25 (m, 6H) ppm;  $^{13}\text{C}$  NMR (100 MHz,  $\text{CDCl}_3$ , 25 °C):  $\delta$  = 171.8, 140.3, 135.6, 128.4 (2C), 120.0 (2C), 30.8, 28.4, 15.7, 9.8 ppm; HRMS ( $\text{EI}^+$ ):  $m/z$ : calcd for  $\text{C}_{11}\text{H}_{15}\text{NO}$ : 177.1154; found 177.1154.

**1-Chloro-4-ethylbenzene (8f)**: CAS Registry Number: 622-98-0

$^1\text{H}$  NMR (500 MHz,  $\text{CDCl}_3$ ):  $\delta$  = 7.11–7.26 (m, 4H), 2.61 (q,  $^3J(\text{H,H})$  = 7.5 Hz, 2H), 1.22 (t,  $^3J(\text{H,H})$  = 7.5 Hz, 3H) ppm;  $^{13}\text{C}$  NMR (100 MHz,  $\text{CDCl}_3$ , 25 °C):  $\delta$  = 142.7, 131.3, 129.3 (2C), 128.4 (2C), 28.3, 15.6 ppm.

**1-Ethyl-4-fluorobenzene (8g)**: CAS Registry Number: 459-47-2

$^1\text{H}$  NMR (400 MHz,  $\text{CDCl}_3$ ):  $\delta$  = 6.92–7.15 (m, 4H), 2.61 (q,  $^3J(\text{H,H})$  = 7.6 Hz, 2H), 1.21 (t,  $^3J(\text{H,H})$  = 7.6 Hz, 3H) ppm;  $^{13}\text{C}$  NMR (100 MHz,  $\text{CDCl}_3$ , 25 °C):  $\delta$  = 162.4, 139.9, 129.2 (d,  $^3J(\text{C,F})$  = 7.6 Hz, 2C), 115.0 (d,  $^3J(\text{C,F})$  = 21.0 Hz, 2C), 28.2, 15.8 ppm.

**1-Ethyl-2-fluorobenzene (8h)**: CAS Registry Number: 446-49-1

$^1\text{H}$  NMR (500 MHz,  $\text{CDCl}_3$ ):  $\delta$  = 6.98–7.21 (m, 4H), 2.68 (q,  $^3J(\text{H,H}) = 7.5$  Hz, 2H), 1.22 (t,  $^3J(\text{H,H})=7.5$  Hz, 3H) ppm;  $^{13}\text{C}$  NMR (100 MHz,  $\text{CDCl}_3$ , 25 °C):  $\delta$  = 161.2 (d,  $^1J(\text{C,F}) = 244$  Hz), 131.0 (d,  $^2J(\text{C,F}) = 15.3$  Hz), 129.9, 127.3, 124.0, 115.1 (d,  $^1J(\text{C,F}) = 20.9$  Hz), 22.5, 14.3 ppm.

**4-Ethyl-benzoic acid ethyl ester (8i):** CAS Registry Number: 136569-05-6

$^1\text{H}$  NMR (500 MHz,  $\text{CDCl}_3$ ):  $\delta$  = 7.33–7.89 (m, 4H), 4.38 (q,  $^3J(\text{H,H}) = 7.0$  Hz, 2H), 2.70 (q,  $^3J(\text{H,H}) = 7.5$  Hz, 2H), 1.40 (t,  $^3J(\text{H,H})=7.0$  Hz, 3H), 1.26 (t,  $^3J(\text{H,H})=7.5$  Hz, 3H) ppm;  $^{13}\text{C}$  NMR (100 MHz,  $\text{CDCl}_3$ , 25 °C):  $\delta$  = 166.8, 149.7, 129.7 (2C), 127.9 (2C), 60.8, 29.0, 15.3, 14.4 ppm.

**1-Ethyl-4-(trifluoromethyl)benzene (8k):** CAS Registry Number: 27190-69-8

$^1\text{H}$  NMR (500 MHz,  $\text{CDCl}_3$ ):  $\delta$  = 7.29–7.54 (AA'BB', 4H), 2.71 (q,  $^3J(\text{H,H}) = 7.5$  Hz, 2H), 1.26 (t,  $^3J(\text{H,H})=7.5$  Hz, 3H) ppm;  $^{13}\text{C}$  NMR (100 MHz,  $\text{CDCl}_3$ , 25 °C):  $\delta$  = 148.4, 128.2, 125.3 (q,  $^1J(\text{C,F}) = 3.8$  Hz), 28.8, 15.4 ppm. Full signals for aromatic carbon were not observed.

**(E)-But-1-enylbenzene (8l):** CAS Registry Number: 1005-64-7

$^1\text{H}$  NMR (400 MHz,  $\text{CDCl}_3$ ):  $\delta$  = 7.16–7.35 (m, 5H), 6.37 (d,  $^3J(\text{H,H}) = 16.4$  Hz, 1H), 6.26 (dt,  $^3J(\text{H,H}) = 16.4$  Hz,  $^3J(\text{H,H}) = 6.4$  Hz, 1H), 2.22 (dq,  $^3J(\text{H,H}) = 6.4$  Hz,  $^3J(\text{H,H}) = 7.2$  Hz, 2H), 1.08 (t,  $^3J(\text{H,H}) = 7.2$  Hz, 3H) ppm;  $^{13}\text{C}$  NMR (100 MHz,  $\text{CDCl}_3$ , 25 °C):  $\delta$  = 137.9, 132.6, 128.8, 128.4 (2C), 126.7, 125.9 (2C), 26.1, 13.7 ppm.

**(E)-But-1-enyl-(4-methoxy)benzene (8m):** CAS Registry Number: 18657-09-5

$^1\text{H}$  NMR (400 MHz,  $\text{CDCl}_3$ ):  $\delta$  = 7.27 (d,  $^3J(\text{H,H}) = 8.8$  Hz, 2H), 6.83 (d,  $^3J(\text{H,H}) = 8.8$  Hz, 2H), 6.32 (d,  $^3J(\text{H,H}) = 16.0$  Hz, 1H), 6.12 (dt,  $^3J(\text{H,H}) = 16.0$  Hz,  $^3J(\text{H,H}) = 6.4$  Hz, 1H), 2.20 (dq,

$^3J(\text{H,H}) = 6.4 \text{ Hz}, 7.2 \text{ Hz}, 2\text{H}), 1.08 \text{ (t, } ^3J(\text{H,H}) = 7.2 \text{ Hz, 3H) ppm; } ^{13}\text{C NMR (100 MHz, CDCl}_3, 25 \text{ }^\circ\text{C): } \delta = 158.7, 130.9, 130.6, 128.2, 127.0 \text{ (2C), 114.0 (2C), 55.4, 26.1, 13.9 ppm.}$

4. a) HPLC (RI) chart after the rapid C-[ $^{11}\text{C}$ ]methylation of [ $^{11}\text{C}$ ]methyl iodide and 7c, giving [ $^{11}\text{C}$ ]8c (retention time; 12.8 min), b) HPLC (UV 254 nm) chart after the rapid C-[ $^{11}\text{C}$ ]methylation of [ $^{11}\text{C}$ ]methyl iodide and 7c, c) HPLC (RI) chart after purification of [ $^{11}\text{C}$ ]8c, giving [ $^{11}\text{C}$ ]8c (retention time; 4.5 min), and d) HPLC (UV 254 nm) chart after purification of [ $^{11}\text{C}$ ]8c:

a)

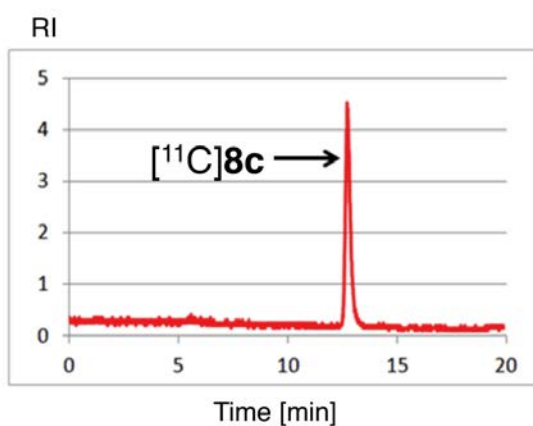

b)

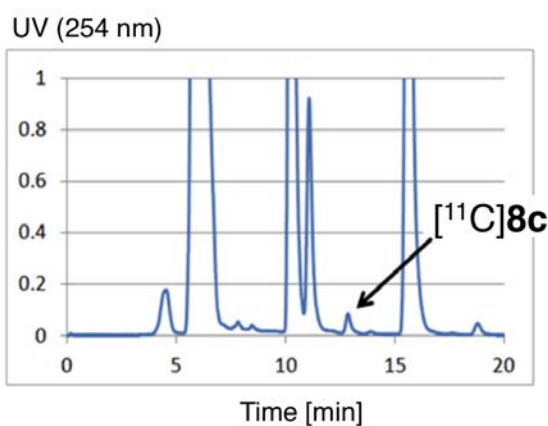

c)

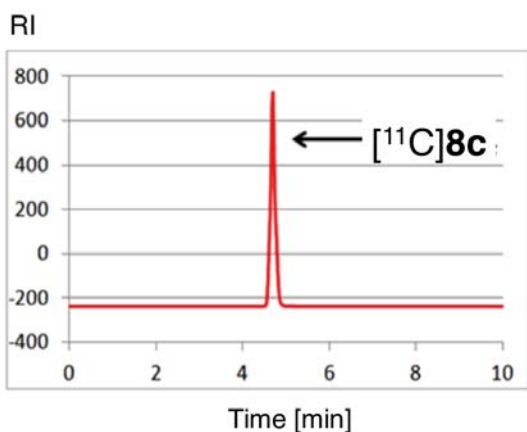

d)

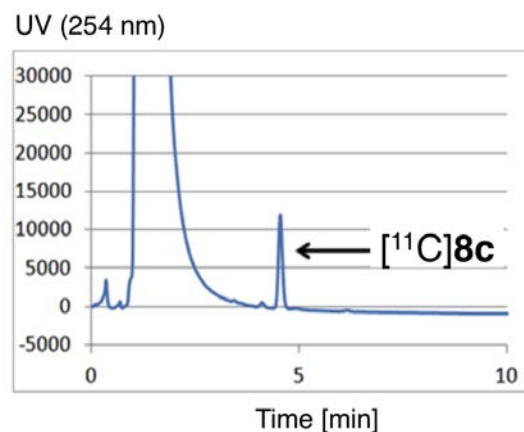

5. a) HPLC (RI) chart for co-injection of [ $^{11}\text{C}$ ]8c and 8c, b) HPLC (UV 254 nm) chart for co-injection of [ $^{11}\text{C}$ ]8c and 8c:

a)

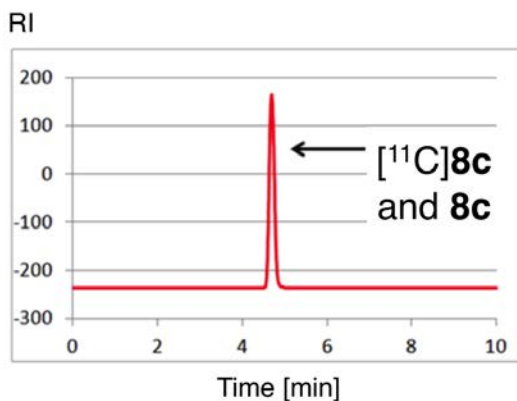

b)

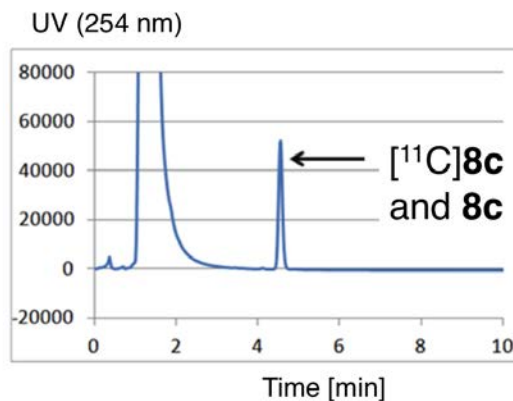

## 6. References

- 1 (a) Z. Lu, G. C. Fu, *Angew. Chem. Int. Ed.*, 2010, **49**, 6676–6678; (b) C. J. Lata, C. M. Crudden, *J. Am. Chem. Soc.*, 2010, **132**, 131–137; (c) C.-T. Yang, Z.-Q. Zhang, Y.-C. Liu, L. Liu, *Angew. Chem. Int. Ed.*, 2011, **50**, 3904–3907.
- 2 M. Moreno-Mañas, F. Pajuelo, R. Pleixats, *J. Org. Chem.*, 1995, **60**, 2396–2397.
